# Supplementary material for: Conducting-Polymer Nanocomposites as Synergistic Supports That Accelerate Electro-Catalysis: PEDOT/Nano Co3O4/rGO as a Photo Catalyst of Oxygen Production from Water
Source: MDPI journal article supplement (doi:10.3390/jcs5090245), 2021-09-12
Supplement: s1 [file s1]

Archive with 1 entries (1 files):
- jcs-1360430-supplementary.pdf
